# Supplementary material
Source: HighWire-hosted journal article supplement (http://cmajopen.ca/highwire/filestream/81288/field_highwire_adjunct_files/0/2019-0008-original-submission.pdf)
Supplement: 2019-0008-original-submission.pdf [file 2019-0008-original-submission.pdf]

1  
2  
3 **1 Characteristics of Canadians likely to try or increase cannabis use following legalization**  
4  
5 **2 for recreational purposes: A cross-sectional study**  
6  
7  
8  
9

10 4 Harman S. Sandhu, HBSc<sup>1</sup>; Laura N. Anderson, PhD<sup>1,2</sup>; Jason W. Busse, PhD, DC<sup>3,4</sup>  
11  
12 5

13  
14 6 <sup>1</sup>Department of Health Research Methods, Evidence, and Impact, McMaster University,  
15  
16  
17 7 Hamilton, ON, Canada.

18  
19 8 <sup>2</sup>Centre for Health Economics and Policy Analysis, McMaster University, Hamilton, ON,  
20  
21  
22 9 Canada.

23  
24 10 <sup>3</sup>Michael G. DeGroote Centre for Medicinal Cannabis Research, McMaster University,  
25  
26  
27 11 Hamilton, ON, Canada.

28 12 <sup>4</sup>Department of Anesthesia, McMaster University, Hamilton, ON, Canada.  
29  
30  
31 13

32  
33 14 **Corresponding Author:** Jason W. Busse, Department of Anesthesia, Michael G. DeGroote  
34  
35 15 School of Medicine, McMaster University, HSC-2V9, 1280 Main St. West, Hamilton, Canada,  
36  
37 16 L8S 4K1; email: bussejw@mcmaster.ca  
38  
39  
40 17

41  
42 18 **Funding:** No funds were received for the preparation of this manuscript.  
43  
44  
45 19

46  
47 20 **Declaration of competing interests:** The authors declare no competing interests.  
48  
49  
50 21

51 22  
52  
53  
54 23

1  
2  
3 **1 ABSTRACT**

4  
5 **2 Background:** The Government of Canada legalized recreational use of cannabis in October  
6  
7  
8 **3** 2018.

9  
10 **4 Methods:** We used data from the 2018 National Cannabis Survey to investigate factors  
11  
12 associated with intent to try or increase cannabis use post–legalization among Canadians using  
13  
14 multivariable logistic regression. Respondents’ data were weighted and bootstrapped. We report  
15  
16  
17 relative measures of association as adjusted odds ratios (aORs) and absolute measure of  
18  
19 association as adjusted risk increases (ARIs).  
20

21  
22 **9 Results:** An estimated 18.5% (95%CI: 17.6–19.5) of the study population indicated that they  
23  
24 intended to try (15.7%) or increase (2.8%) cannabis use following legalization. Our weighted  
25  
26 analysis represented 27,808,081 Canadians 15 years of age or older (unweighted n = 17,089). In  
27  
28 our adjusted regression model, being more likely to try or increase cannabis use was associated  
29  
30 with younger age (15–24 years versus  $\geq 65$ ; aOR 3.8, 95%CI: 2.6–5.6; ARI 20.1%, 95%CI: 13.9–  
31  
32 26.2), cannabis use in the past three months versus not (aOR 3.3, 95%CI: 2.8–3.9; ARI 20.4%,  
33  
34 95%CI: 17.1–23.6), higher income ( $\geq \$80,000$  versus  $< \$40,000$ ; aOR 1.5, 95%CI: 1.3–1.9; ARI  
35  
36 6.1%, 95%CI: 3.2–9.0), and poor or fair mental health compared to good or excellent mental  
37  
38 health (aOR 2.0, 95%CI: 1.6–2.6; ARI 11.5%, 95%CI: 6.7–16.2).  
39  
40

41  
42 **18 Interpretation:** Nearly 1 in 5 respondents reported their intention to try or increase cannabis use  
43  
44 post–legalization. Efforts to promote responsible use of cannabis should be a priority for  
45  
46  
47  
48  
49  
50  
51  
52  
53  
54  
55  
56  
57  
58  
59  
60  
61  
62  
63  
64  
65  
66  
67  
68  
69  
70  
71  
72  
73  
74  
75  
76  
77  
78  
79  
80  
81  
82  
83  
84  
85  
86  
87  
88  
89  
90  
91  
92  
93  
94  
95  
96  
97  
98  
99  
100  
101  
102  
103  
104  
105  
106  
107  
108  
109  
110  
111  
112  
113  
114  
115  
116  
117  
118  
119  
120  
121  
122  
123  
124  
125  
126  
127  
128  
129  
130  
131  
132  
133  
134  
135  
136  
137  
138  
139  
140  
141  
142  
143  
144  
145  
146  
147  
148  
149  
150  
151  
152  
153  
154  
155  
156  
157  
158  
159  
160  
161  
162  
163  
164  
165  
166  
167  
168  
169  
170  
171  
172  
173  
174  
175  
176  
177  
178  
179  
180  
181  
182  
183  
184  
185  
186  
187  
188  
189  
190  
191  
192  
193  
194  
195  
196  
197  
198  
199  
200  
201  
202  
203  
204  
205  
206  
207  
208  
209  
210  
211  
212  
213  
214  
215  
216  
217  
218  
219  
220  
221  
222  
223  
224  
225  
226  
227  
228  
229  
230  
231  
232  
233  
234  
235  
236  
237  
238  
239  
240  
241  
242  
243  
244  
245  
246  
247  
248  
249  
250  
251  
252  
253  
254  
255  
256  
257  
258  
259  
260  
261  
262  
263  
264  
265  
266  
267  
268  
269  
270  
271  
272  
273  
274  
275  
276  
277  
278  
279  
280  
281  
282  
283  
284  
285  
286  
287  
288  
289  
290  
291  
292  
293  
294  
295  
296  
297  
298  
299  
300  
301  
302  
303  
304  
305  
306  
307  
308  
309  
310  
311  
312  
313  
314  
315  
316  
317  
318  
319  
320  
321  
322  
323  
324  
325  
326  
327  
328  
329  
330  
331  
332  
333  
334  
335  
336  
337  
338  
339  
340  
341  
342  
343  
344  
345  
346  
347  
348  
349  
350  
351  
352  
353  
354  
355  
356  
357  
358  
359  
360  
361  
362  
363  
364  
365  
366  
367  
368  
369  
370  
371  
372  
373  
374  
375  
376  
377  
378  
379  
380  
381  
382  
383  
384  
385  
386  
387  
388  
389  
390  
391  
392  
393  
394  
395  
396  
397  
398  
399  
400  
401  
402  
403  
404  
405  
406  
407  
408  
409  
410  
411  
412  
413  
414  
415  
416  
417  
418  
419  
420  
421  
422  
423  
424  
425  
426  
427  
428  
429  
430  
431  
432  
433  
434  
435  
436  
437  
438  
439  
440  
441  
442  
443  
444  
445  
446  
447  
448  
449  
450  
451  
452  
453  
454  
455  
456  
457  
458  
459  
460  
461  
462  
463  
464  
465  
466  
467  
468  
469  
470  
471  
472  
473  
474  
475  
476  
477  
478  
479  
480  
481  
482  
483  
484  
485  
486  
487  
488  
489  
490  
491  
492  
493  
494  
495  
496  
497  
498  
499  
500  
501  
502  
503  
504  
505  
506  
507  
508  
509  
510  
511  
512  
513  
514  
515  
516  
517  
518  
519  
520  
521  
522  
523  
524  
525  
526  
527  
528  
529  
530  
531  
532  
533  
534  
535  
536  
537  
538  
539  
540  
541  
542  
543  
544  
545  
546  
547  
548  
549  
550  
551  
552  
553  
554  
555  
556  
557  
558  
559  
560  
561  
562  
563  
564  
565  
566  
567  
568  
569  
570  
571  
572  
573  
574  
575  
576  
577  
578  
579  
580  
581  
582  
583  
584  
585  
586  
587  
588  
589  
590  
591  
592  
593  
594  
595  
596  
597  
598  
599  
600  
601  
602  
603  
604  
605  
606  
607  
608  
609  
610  
611  
612  
613  
614  
615  
616  
617  
618  
619  
620  
621  
622  
623  
624  
625  
626  
627  
628  
629  
630  
631  
632  
633  
634  
635  
636  
637  
638  
639  
640  
641  
642  
643  
644  
645  
646  
647  
648  
649  
650  
651  
652  
653  
654  
655  
656  
657  
658  
659  
660  
661  
662  
663  
664  
665  
666  
667  
668  
669  
670  
671  
672  
673  
674  
675  
676  
677  
678  
679  
680  
681  
682  
683  
684  
685  
686  
687  
688  
689  
690  
691  
692  
693  
694  
695  
696  
697  
698  
699  
700  
701  
702  
703  
704  
705  
706  
707  
708  
709  
710  
711  
712  
713  
714  
715  
716  
717  
718  
719  
720  
721  
722  
723  
724  
725  
726  
727  
728  
729  
730  
731  
732  
733  
734  
735  
736  
737  
738  
739  
740  
741  
742  
743  
744  
745  
746  
747  
748  
749  
750  
751  
752  
753  
754  
755  
756  
757  
758  
759  
760  
761  
762  
763  
764  
765  
766  
767  
768  
769  
770  
771  
772  
773  
774  
775  
776  
777  
778  
779  
780  
781  
782  
783  
784  
785  
786  
787  
788  
789  
790  
791  
792  
793  
794  
795  
796  
797  
798  
799  
800  
801  
802  
803  
804  
805  
806  
807  
808  
809  
810  
811  
812  
813  
814  
815  
816  
817  
818  
819  
820  
821  
822  
823  
824  
825  
826  
827  
828  
829  
830  
831  
832  
833  
834  
835  
836  
837  
838  
839  
840  
841  
842  
843  
844  
845  
846  
847  
848  
849  
850  
851  
852  
853  
854  
855  
856  
857  
858  
859  
860  
861  
862  
863  
864  
865  
866  
867  
868  
869  
870  
871  
872  
873  
874  
875  
876  
877  
878  
879  
880  
881  
882  
883  
884  
885  
886  
887  
888  
889  
890  
891  
892  
893  
894  
895  
896  
897  
898  
899  
900  
901  
902  
903  
904  
905  
906  
907  
908  
909  
910  
911  
912  
913  
914  
915  
916  
917  
918  
919  
920  
921  
922  
923  
924  
925  
926  
927  
928  
929  
930  
931  
932  
933  
934  
935  
936  
937  
938  
939  
940  
941  
942  
943  
944  
945  
946  
947  
948  
949  
950  
951  
952  
953  
954  
955  
956  
957  
958  
959  
960  
961  
962  
963  
964  
965  
966  
967  
968  
969  
970  
971  
972  
973  
974  
975  
976  
977  
978  
979  
980  
981  
982  
983  
984  
985  
986  
987  
988  
989  
990  
991  
992  
993  
994  
995  
996  
997  
998  
999  
1000

51  
52 **22 Keywords:** Cannabis; Marijuana; Health behavior; Canada; Health policy; Public health  
53  
54  
55  
56  
57  
58  
59  
60  
61  
62  
63  
64  
65  
66  
67  
68  
69  
70  
71  
72  
73  
74  
75  
76  
77  
78  
79  
80  
81  
82  
83  
84  
85  
86  
87  
88  
89  
90  
91  
92  
93  
94  
95  
96  
97  
98  
99  
100  
101  
102  
103  
104  
105  
106  
107  
108  
109  
110  
111  
112  
113  
114  
115  
116  
117  
118  
119  
120  
121  
122  
123  
124  
125  
126  
127  
128  
129  
130  
131  
132  
133  
134  
135  
136  
137  
138  
139  
140  
141  
142  
143  
144  
145  
146  
147  
148  
149  
150  
151  
152  
153  
154  
155  
156  
157  
158  
159  
160  
161  
162  
163  
164  
165  
166  
167  
168  
169  
170  
171  
172  
173  
174  
175  
176  
177  
178  
179  
180  
181  
182  
183  
184  
185  
186  
187  
188  
189  
190  
191  
192  
193  
194  
195  
196  
197  
198  
199  
200  
201  
202  
203  
204  
205  
206  
207  
208  
209  
210  
211  
212  
213  
214  
215  
216  
217  
218  
219  
220  
221  
222  
223  
224  
225  
226  
227  
228  
229  
230  
231  
232  
233  
234  
235  
236  
237  
238  
239  
240  
241  
242  
243  
244  
245  
246  
247  
248  
249  
250  
251  
252  
253  
254  
255  
256  
257  
258  
259  
260  
261  
262  
263  
264  
265  
266  
267  
268  
269  
270  
271  
272  
273  
274  
275  
276  
277  
278  
279  
280  
281  
282  
283  
284  
285  
286  
287  
288  
289  
290  
291  
292  
293  
294  
295  
296  
297  
298  
299  
300  
301  
302  
303  
304  
305  
306  
307  
308  
309  
310  
311  
312  
313  
314  
315  
316  
317  
318  
319  
320  
321  
322  
323  
324  
325  
326  
327  
328  
329  
330  
331  
332  
333  
334  
335  
336  
337  
338  
339  
340  
341  
342  
343  
344  
345  
346  
347  
348  
349  
350  
351  
352  
353  
354  
355  
356  
357  
358  
359  
360  
361  
362  
363  
364  
365  
366  
367  
368  
369  
370  
371  
372  
373  
374  
375  
376  
377  
378  
379  
380  
381  
382  
383  
384  
385  
386  
387  
388  
389  
390  
391  
392  
393  
394  
395  
396  
397  
398  
399  
400  
401  
402  
403  
404  
405  
406  
407  
408  
409  
410  
411  
412  
413  
414  
415  
416  
417  
418  
419  
420  
421  
422  
423  
424  
425  
426  
427  
428  
429  
430  
431  
432  
433  
434  
435  
436  
437  
438  
439  
440  
441  
442  
443  
444  
445  
446  
447  
448  
449  
450  
451  
452  
453  
454  
455  
456  
457  
458  
459  
460  
461  
462  
463  
464  
465  
466  
467  
468  
469  
470  
471  
472  
473  
474  
475  
476  
477  
478  
479  
480  
481  
482  
483  
484  
485  
486  
487  
488  
489  
490  
491  
492  
493  
494  
495  
496  
497  
498  
499  
500  
501  
502  
503  
504  
505  
506  
507  
508  
509  
510  
511  
512  
513  
514  
515  
516  
517  
518  
519  
520  
521  
522  
523  
524  
525  
526  
527  
528  
529  
530  
531  
532  
533  
534  
535  
536  
537  
538  
539  
540  
541  
542  
543  
544  
545  
546  
547  
548  
549  
550  
551  
552  
553  
554  
555  
556  
557  
558  
559  
560  
561  
562  
563  
564  
565  
566  
567  
568  
569  
570  
571  
572  
573  
574  
575  
576  
577  
578  
579  
580  
581  
582  
583  
584  
585  
586  
587  
588  
589  
590  
591  
592  
593  
594  
595  
596  
597  
598  
599  
600  
601  
602  
603  
604  
605  
606  
607  
608  
609  
610  
611  
612  
613  
614  
615  
616  
617  
618  
619  
620  
621  
622  
623  
624  
625  
626  
627  
628  
629  
630  
631  
632  
633  
634  
635  
636  
637  
638  
639  
640  
641  
642  
643  
644  
645  
646  
647  
648  
649  
650  
651  
652  
653  
654  
655  
656  
657  
658  
659  
660  
661  
662  
663  
664  
665  
666  
667  
668  
669  
670  
671  
672  
673  
674  
675  
676  
677  
678  
679  
680  
681  
682  
683  
684  
685  
686  
687  
688  
689  
690  
691  
692  
693  
694  
695  
696  
697  
698  
699  
700  
701  
702  
703  
704  
705  
706  
707  
708  
709  
710  
711  
712  
713  
714  
715  
716  
717  
718  
719  
720  
721  
722  
723  
724  
725  
726  
727  
728  
729  
730  
731  
732  
733  
734  
735  
736  
737  
738  
739  
740  
741  
742  
743  
744  
745  
746  
747  
748  
749  
750  
751  
752  
753  
754  
755  
756  
757  
758  
759  
760  
761  
762  
763  
764  
765  
766  
767  
768  
769  
770  
771  
772  
773  
774  
775  
776  
777  
778  
779  
780  
781  
782  
783  
784  
785  
786  
787  
788  
789  
790  
791  
792  
793  
794  
795  
796  
797  
798  
799  
800  
801  
802  
803  
804  
805  
806  
807  
808  
809  
810  
811  
812  
813  
814  
815  
816  
817  
818  
819  
820  
821  
822  
823  
824  
825  
826  
827  
828  
829  
830  
831  
832  
833  
834  
835  
836  
837  
838  
839  
840  
841  
842  
843  
844  
845  
846  
847  
848  
849  
850  
851  
852  
853  
854  
855  
856  
857  
858  
859  
860  
861  
862  
863  
864  
865  
866  
867  
868  
869  
870  
871  
872  
873  
874  
875  
876  
877  
878  
879  
880  
881  
882  
883  
884  
885  
886  
887  
888  
889  
890  
891  
892  
893  
894  
895  
896  
897  
898  
899  
900  
901  
902  
903  
904  
905  
906  
907  
908  
909  
910  
911  
912  
913  
914  
915  
916  
917  
918  
919  
920  
921  
922  
923  
924  
925  
926  
927  
928  
929  
930  
931  
932  
933  
934  
935  
936  
937  
938  
939  
940  
941  
942  
943  
944  
945  
946  
947  
948  
949  
950  
951  
952  
953  
954  
955  
956  
957  
958  
959  
960  
961  
962  
963  
964  
965  
966  
967  
968  
969  
970  
971  
972  
973  
974  
975  
976  
977  
978  
979  
980  
981  
982  
983  
984  
985  
986  
987  
988  
989  
990  
991  
992  
993  
994  
995  
996  
997  
998  
999  
1000

## 1 Introduction

2 Cannabis refers to products of the dried leaves and flowers of the *Cannabis sativa* plant which is  
3 consumed for medical and recreational purposes.(1) Although recreational use of cannabis was  
4 illegal in Canada prior to October 2018, Canadians were the leading consumers of cannabis in  
5 the developed world.(2) According to the 2012 Canadian Community Health Survey (CCHS),  
6 12.2% of Canadians aged 15 or older reported using cannabis in the past year.(3) Daily use was  
7 reported by 1.8% and was more common in males (2.4%) versus females (1.2%), and among  
8 those who were 18–24 years of age (4.9%).(3) A long–term trends study confirmed greater  
9 cannabis use among younger males and also showed that, from 2004 to 2015, past–year cannabis  
10 use increased among Canadians aged 25 and older.(4)

11  
12 Observational studies have shown that cannabis users are more likely to be involved in motor  
13 vehicle collisions, with a systematic review finding double the odds of being involved in a  
14 collision while under the influence of cannabis compared to unimpaired driving (OR 1.92,  
15 95%CI: 1.35–2.73).(5) Cannabis use is also associated with anxiety, psychotic symptoms,  
16 chronic bronchitis, impaired respiratory function, and cannabis use disorder.(6–11) The lifetime  
17 risk of addiction among Canadians who used cannabis was estimated to be 6.8% in 2012 and an  
18 estimated 1.3% met criteria for cannabis abuse or dependence in the past year.(12) Moreover, the  
19 potency of illicit cannabis has increased from 4% in 1995, to 12% in 2014, in the United States  
20 (US)(13), and higher potency has been shown to be associated with adverse health outcomes  
21 such as greater emergency department visits involving drug use.(10,11,14,15)

1  
2  
3 1 In an effort to promote responsible use, deter criminal activity, and protect public health and  
4  
5 2 safety, the federal government legalized the use of recreational cannabis on October 17<sup>th</sup>,  
6  
7 3 2018.(16) This is in addition to medical cannabis which has been legal in Canada since 2001.(17)  
8  
9 4 There are concerns that recreational cannabis may increase use and subsequent harm.(18) The  
10  
11 5 impact of legalization based on evidence from US States is mixed with some studies showing  
12  
13 6 increased rates of use and other showing no change.(19–22) Moreover, a 2016 narrative review  
14  
15 7 found inconsistent evidence for an association between policy change and increased uptake of  
16  
17 8 cannabis among youth.(23)  
18  
19  
20  
21  
22  
23

24 10 Monitoring cannabis use prevalence, patterns of use, and modes of use are crucial to determining  
25  
26 11 the impact of policy change.(24) Statistics Canada, the national statistics agency, developed and  
27  
28 12 implemented the 2018 National Cannabis Survey (NCS), a novel cross-sectional survey which  
29  
30 13 aims to better understand the frequency of cannabis use and to monitor changes in attitudes and  
31  
32 14 behavior as a result of legalization.(25) Our objectives were to: (1) determine the prevalence of  
33  
34 15 Canadians (aged 15 years or older) likely to try or increase cannabis use after legalization for  
35  
36 16 recreational purposes; and (2) explore characteristics associated with intent to try or increase use.  
37  
38  
39  
40  
41

## 42 18 **Methods**

43  
44  
45 19 We followed standards set by the “Strengthening the Reporting of Observational Studies in  
46  
47 20 Epidemiology” (STROBE) statement for reporting our study.(26)  
48  
49  
50  
51  
52  
53  
54  
55  
56  
57  
58  
59  
60

1  
2  
3 1 *Study design & respondents*  
4

5 2 This is a cross-sectional study involving analysis of the 2018 NCS master file.(25,27) The NCS  
6  
7 3 was developed by Statistics Canada in consultation with the Public Health Agency of Canada,  
8  
9 4 Department of Justice of Canada, and Public Safety Canada.(25) Cognitive testing of  
10  
11 5 questionnaire content was conducted and validation of estimates was done through cross-  
12  
13 6 tabulations of other data and consultation with Statistics Canada stakeholders.(25) The data used  
14  
15 7 in this study were collected just prior to legalization of recreational cannabis, from February to  
16  
17 8 September 2018 (waves 1–3).(25) Data from the three waves were independent of each other,  
18  
19 9 and were combined and analyzed together. Participation in the NCS was voluntary and data were  
20  
21 10 collected through an electronic questionnaire or computer-assisted telephone interview.(25) The  
22  
23 11 study population consisted of non-institutionalized Canadians, aged 15 years or older, residing in  
24  
25 12 Canada’s 10 provinces and three territory capital cities.(25) The sampling method was two-stage  
26  
27 13 (dwelling and person) stratified by province or territory, and a simple random sample of  
28  
29 14 dwellings which aimed to represent the Canadian population.(25) The NCS master file was  
30  
31 15 accessed through the McMaster University Statistics Canada Research Data Centre.(28)  
32  
33  
34  
35  
36  
37  
38  
39

40 17 *Measures*  
41

42 18 Our primary outcome measure was derived from an NCS question that asked when cannabis  
43  
44 19 consumption becomes legal for recreational purposes, would respondents be more likely to try  
45  
46 20 cannabis or increase their consumption?(27) Response options included: “Yes”, “Maybe”, or  
47  
48 21 “No”. We also summarized whether respondents would be more likely to try different types of  
49  
50 22 cannabis products or acquire cannabis from another source after legalization. Information on  
51  
52 23 gender, age, cannabis use in the past three months, education and income level, main activity  
53  
54  
55  
56  
57  
58  
59  
60

1 during the previous week, and self-reported mental health were also collected and analyzed for  
2 association with intention to try or increase cannabis use. Categories for age, education level,  
3 income level, main activity, and self-reported mental health were collapsed to ensure adequate  
4 cell size and simplify analysis and subsequent interpretation. The full questionnaire is available  
5 through Statistics Canada.(27)

### 6 7 *Statistical analysis*

8 Descriptive statistics were used to summarize the data. We constructed univariable and  
9 multivariable logistic regression models to explore factors associated with the intent to try or  
10 increase cannabis use following legalization (those who responded “Yes or Maybe” compared to  
11 those who answered “No”). Of the individuals that endorsed the intent to try or increase cannabis  
12 use after legalization, we considered those who had not used cannabis in the past three months to  
13 be new users. Our independent variables were: (1) gender; (2) age; (3) cannabis use in past three  
14 months; (4) education level; (5) income level; (6) main activity during the previous week; and  
15 (7) self-reported mental health. We also adjusted our multivariable regression model for survey  
16 wave and province or territory of residence. Results are presented as aORs along with 95%  
17 confidence intervals (95% CIs). All analyses were two-tailed and statistical significance was  
18 defined as  $p < 0.05$ .

19  
20 Prior to analysis, we reviewed unweighted frequencies of the independent variables to ensure  
21 adequate cell sizes (at least 10 events per variable).(29) Bootstrap weights provided by Statistics  
22 Canada were applied to convert unweighted frequencies to represent the Canadian population  
23 and adjust for biases in the survey sampling design.(30) Missing data were excluded from our

1 regression analysis using listwise deletion. For all statistically significant associations in our  
2 adjusted model, we calculated adjusted risk increases (ARI) by subtracting the risk of the  
3 outcome in the referent group (e.g. age  $\geq 65$ ) from the risk in the comparator group (e.g. age 15-  
4 24), while holding all other variables constant.(31) The likelihood ratio test was performed to  
5 determine if the multivariable logistic regression model fit significantly better than a model with  
6 no predictors and the Wald test determined significance of individual predictors in the model. A  
7 Hosmer–Lemeshow test was performed to assess goodness–of–fit of our adjusted model.(32) All  
8 analyses were performed using Stata/SE 15 software.(33)

#### 9 10 *Ethics consideration*

11 As per the Tri–Council Policy Statement: Ethical Conduct for Research Involving Humans  
12 Article 2.2 (a), research is exempt from research ethics board review if it relies exclusively on  
13 publicly available information that is legally accessible to the public and appropriately protected  
14 by law.(34) Our results were reviewed by a Statistics Canada Research Data Centre Analyst prior  
15 to release to ensure confidentiality of survey respondents.

#### 16 17 **Results**

18 Of 39,000 households selected for recruitment of NCS waves 1–3, 17,089 respondents had  
19 provided complete data and were included in our multivariable logistic regression analysis  
20 (survey completion rate = 43.8%).(25) There was an equal distribution of males and females,  
21 most were employed (59.2%), the majority (93.8%) reported good to excellent mental health,  
22 and 15.2% reported use of cannabis in the past three months (Table 1). The “please specify”  
23 category of gender was removed from analysis and not reported due to very low response ( $n <$

10). Overall, 18.5% (95%CI: 17.6–19.5) of individuals were likely to try or increase their recreational use of cannabis following legalization with an estimated 15.7% being new users. Almost a quarter of respondents (22.6%, 95%CI: 21.7–23.6) were likely to try different types of cannabis products and 16.7% (95%CI: 15.8–17.6) were likely to acquire cannabis from a new source (see Figure 1).

In our adjusted model, younger age (15–24 years OR 3.8, 95%CI: 2.6–5.6; ARI 20.1%, 95%CI: 13.9–26.2), cannabis use in past three months (OR 3.3, 95%CI: 2.8–3.9; ARI 20.4%, 95%CI: 17.1–23.6), higher income ( $\geq$ \$80,000 OR 1.5, 95%CI: 1.3–1.9; ARI 6.1%, 95%CI: 3.2–9.0), and poor or fair mental health (OR: 2.0, 95%CI: 1.6–2.6; ARI 11.5%, 95%CI: 6.7–16.2) were associated with a greater likelihood of trying or increasing cannabis use following legalization compared to referent categories (Table 2). The Hosmer-Lemeshow ( $p = 0.46$ ) and likelihood ratio ( $p < 0.05$ ) tests suggested good fit of our adjusted model.

## 15 Interpretation

The NCS data collected prior to legalization suggests that nearly 1 in 5 Canadians intend on trying or increasing cannabis use following legalization for recreational purposes with a majority being new users. Those who are younger, used cannabis in the past three months, report higher income and poorer mental health were significantly more likely to try or increase cannabis use following legalization. Furthermore, we found that almost 1 in 4 Canadians were likely to try consuming different types of cannabis products, which will become legally available in October 2019.(35) A 2017 survey of 1,087 Canadians found that up to 46% are willing to try cannabis-infused food products.(36) In addition, a 2018 Deloitte survey found that 58% Canadian



1  
2  
3 1 cannabis users prefer edible products.(37) We also found that 1 in 6 respondents intended to  
4  
5 2 obtain cannabis from alternate sources after legalization and the Deloitte survey found that  
6  
7 3 Canadian cannabis users will shift up to 63% of their purchases towards legal channels.(37)  
8  
9  
10 4  
11  
12 5 Further complementing our findings, a 2014 survey of 3,532 US adults aged 18 to 34 found that  
13  
14 6 13.5% reported they would use cannabis more frequently if it were legalized.(38) This may be  
15  
16 7 cause for concern as younger individuals are at a higher risk of experiencing harms associated  
17  
18 8 with cannabis use;(7,10,11,39–41) however, intent may or may not translate into action.  
19  
20 9 Consistent with our findings, the 2014 US study also found that cannabis non–users experiencing  
21  
22 10 anxiety were more likely to endorse interest in trying cannabis if it were legal.(38) Although  
23  
24 11 some studies have reported an association between cannabis use and mental illness (e.g. early  
25  
26 12 onset psychosis among those who are predisposed, depression, anxiety, substance use disorder),  
27  
28 13 management of psychiatric disorders is also one of the top cited reasons for cannabis use.(41–45)  
29  
30 14 The association may therefore be bi–directional. The Canadian Psychiatric Association released  
31  
32 15 a position statement in 2018 highlighting concerns over the impact of increased access to  
33  
34 16 cannabis and mental health, particularly for youth.(46) Healthcare incidences involving cannabis  
35  
36 17 increased following legalization in Colorado(47), and cannabis–related hospitalizations have  
37  
38 18 been shown to be associated with higher rates of mental illness.(48,49)  
39  
40  
41  
42  
43  
44 19  
45  
46 20 There is also evidence to suggest that the general public may underestimate harms associated  
47  
48 21 with cannabis. A 2017 national survey of 16,280 US adults found 22.4% believe cannabis is not  
49  
50 22 addictive and 9% believe there are no risks associated with cannabis use.(50) A 2013 qualitative  
51  
52 23 study of 76 Canadian youth (aged 14–19 years) found that many were unaware of the potential  
53  
54  
55  
56  
57  
58  
59  
60

1 harms associated with cannabis use, highlighting a potential area for further education.(51)  
2  
3  
4  
5  
6  
7  
8  
9  
10  
11  
12  
13  
14  
15  
16  
17  
18  
19  
20  
21  
22  
23  
24  
25  
26  
27  
28  
29  
30  
31  
32  
33  
34  
35  
36  
37  
38  
39  
40  
41  
42  
43  
44  
45  
46  
47  
48  
49  
50  
51  
52  
53  
54  
55  
56  
57  
58  
59  
60

1 harms associated with cannabis use, highlighting a potential area for further education.(51)  
2 Continued national–level monitoring of changing attitudes and behaviours regarding cannabis  
3 use through surveys like the NCS will help assess the public health impact of cannabis  
4 legalization.(4,21,52)

### 6 *Limitations*

7 Self-reported use of cannabis and intention to try or increase use may be subject to measurement  
8 error and bias. It is possible that prevalence of cannabis use may have been underreported,  
9 although a number of studies have found self–reported cannabis use to be as reliable as other  
10 self–reported behaviors.(7,53,54) There is a potential for non–response bias due to sampling  
11 design and the completion rate, however bootstrap weighting by Statistics Canada attempts to  
12 addresses this by adjusting the representation of the data to be closer to the intended sample.  
13 Furthermore, the NCS did not collect information on institutionalized persons and our findings  
14 may not be generalizable to this population. Finally, the NCS data used for our study only  
15 measured intentions to use cannabis, not actual changes in behaviour, and only associations are  
16 reported.

### 18 *Conclusion*

19 Almost 1 in 5 Canadians intend to try or increase cannabis use following legalization for  
20 recreational purposes; particularly those who are younger, have used cannabis in the past three  
21 months, have higher income, and self–report their mental health as poor or fair. Clinicians,  
22 public health officials, and policymakers should pay special attention to these higher–risk  
23 populations to ensure informed decision–making and responsible use. Continued monitoring

1  
2  
3 1 through national-level surveys, such as the NCS, will be crucial in establishing rates and patterns  
4  
5 2 of cannabis use among Canadians after recreational use becomes legal.  
6  
7  
8 3

9  
10 4 **Acknowledgements:** We would like to thank Dr. Li Wang, Dr. Peter Kitchen, and Dr. Mustafa  
11  
12 5 Ornek (McMaster University Statistics Canada Research Data Centre) and Dr. Behnam Sadeghi  
13  
14 6 (Department of Health Research Methods, Evidence, and Impact, McMaster University) for  
15  
16 7 statistical support. We also thank Dr. Emmanuel Guindon (Department of Health Research  
17  
18 8 Methods, Evidence, and Impact, McMaster University) for review of our manuscript.  
19  
20  
21 9

22  
23  
24 10 **Data access:** The 2018 National Cannabis Survey master file can be accessed through a  
25  
26 11 Statistics Canada Research Data Centre. The analysis code can be accessed by contacting the  
27  
28 12 corresponding author.  
29  
30  
31 13  
32  
33 14  
34  
35 15  
36  
37 16  
38  
39 17  
40  
41 18  
42  
43 19  
44  
45 20  
46  
47 21  
48  
49 22  
50  
51 23  
52  
53  
54  
55  
56  
57  
58  
59  
60

## 1     **References**

- 2     1.     Russo E. Cannabis and Cannabinoids: Pharmacology, Toxicology and Therapeutic  
3           Potential. Routledge; 2003.
- 4     2.     United Nations Office on Drugs and Crime. Recent Statistics and Trend Analysis of Illicit  
5           Drug Markets - Cannabis Overview [Internet]. Vienna, Austria; 2014. Available from:  
6           [https://www.unodc.org/documents/wdr2014/World\\_Drug\\_Report\\_2014\\_web.pdf](https://www.unodc.org/documents/wdr2014/World_Drug_Report_2014_web.pdf)
- 7     3.     Rotermann M, Langlois K. Prevalence and correlates of marijuana use in Canada, 2012.  
8           Heal Rep. 2015;26(4):10–5.
- 9     4.     Rotermann M, Macdonald R. Analysis of trends in the prevalence of cannabis use in  
10           Canada, 1985 to 2015 [Internet]. Statistics Canada; 2018 [cited 2019 Jan 9]. Available  
11           from: <http://www.statcan.gc.ca/pub/82-003-x/2018002/article/54908-eng.htm>
- 12    5.     Asbridge M, Hayden JA, Cartwright JL. Acute cannabis consumption and motor vehicle  
13           collision risk: Systematic review of observational studies and meta-analysis. BMJ  
14           [Internet]. 2012 Feb 9 [cited 2018 Dec 7];344(7846):e536. Available from:  
15           <http://www.ncbi.nlm.nih.gov/pubmed/22323502>
- 16    6.     Hall W, Degenhardt L. Adverse health effects of non-medical cannabis use. Lancet.  
17           2009;374(9698):1383–91.
- 18    7.     Hall W, Pacula RL. Cannabis use and dependence : public health and public policy.  
19           Melbourne: Cambridge University Press; 2003. 298 p.
- 20    8.     Budney AJ, Hughes JR. The cannabis withdrawal syndrome [Internet]. Vol. 19, Current  
21           Opinion in Psychiatry. 2006 [cited 2018 Mar 15]. p. 233–8. Available from:  
22           <https://insights.ovid.com/crossref?an=00001504-200605000-00002>
- 23    9.     Roffman R, Stephens R. Cannabis dependence: its nature, consequences and treatment.

- 1  
2  
3 1 Cambridge, United Kingdom: Cambridge University Press; 2006.  
4  
5 2 10. Volkow ND, Baler RD, Compton WM, Weiss SRB. Adverse Health Effects of Marijuana  
6  
7 Use. *N Engl J Med* [Internet]. 2014;370(23):2219–27. Available from:  
8  
9 <http://www.nejm.org/doi/10.1056/NEJMra1402309>  
10  
11 4  
12 5 11. Hall W. What has research over the past two decades revealed about the adverse health  
13  
14 effects of recreational cannabis use? *Addiction*. 2015;110(1):19–35.  
15  
16 6  
17 7 12. Pearson C, Janz T, Ali J. Mental and substance use disorders in Canada. *Stat Canada Cat*  
18  
19 [Internet]. 82–624–X. Available from: <https://www150.statcan.gc.ca/n1/pub/82-624->  
20  
21 [x/2013001/article/11855-eng.htm](https://www150.statcan.gc.ca/n1/pub/82-624-x/2013001/article/11855-eng.htm)  
22  
23 9  
24 10 13. ElSohly MA, Mehmedic Z, Foster S, Gon C, Chandra S, Church JC. Changes in cannabis  
25  
26 potency over the last 2 decades (1995-2014): Analysis of current data in the United States.  
27  
28 *Biol Psychiatry* [Internet]. 2016 Apr 1 [cited 2018 Oct 1];79(7):613–9. Available from:  
29  
30 <http://www.ncbi.nlm.nih.gov/pubmed/26903403>  
31  
32 13  
33 14 14. Di Forti M, Sallis H, Allegri F, Trotta A, Ferraro L, Stilo SA, et al. Daily use, especially  
34  
35 of high-potency cannabis, drives the earlier onset of psychosis in cannabis users.  
36  
37 *Schizophr Bull* [Internet]. 2014 Nov 1 [cited 2018 Mar 15];40(6):1509–17. Available  
38  
39 from: <https://academic.oup.com/schizophreniabulletin/article->  
40  
41 [lookup/doi/10.1093/schbul/sbt181](https://academic.oup.com/schizophreniabulletin/article-lookup/doi/10.1093/schbul/sbt181)  
42  
43 18  
44 19 15. Substance Abuse and Mental Health Services Administration. Drug Abuse Warning  
45  
46 Network 2011: National Estimated of Drug-related Emergency Department Visits.  
47  
48 Rockville, MD. HHS Publication No. (SMA) 13-4760, DAWN Series D-39; 2013.  
49  
50 21  
51 22 16. Parliament of Canada. Government Bill (House of Commons) C-45 (42-1) - Royal Assent  
52  
53 - Cannabis Act [Internet]. [cited 2019 Jan 9]. Available from:  
54  
55 23  
56  
57  
58  
59  
60

- 1  
2  
3 1 <http://www.parl.ca/DocumentViewer/en/42-1/bill/C-45/royal-assent>  
4  
5  
6 2 17. Fischer B, Kuganesan S, Room R. Medical marijuana programs: Implications for cannabis  
7  
8 3 control policy - Observations from Canada. *Int J Drug Policy* [Internet]. 2015;26(1):15–9.  
9  
10 4 Available from: <http://dx.doi.org/10.1016/j.drugpo.2014.09.007>  
11  
12 5 18. Kelsall D. Watching Canada’s experiment with legal cannabis. *CMAJ* [Internet]. 2018 Oct  
13  
14 6 15 [cited 2018 Dec 13];190(41):E1218. Available from:  
15  
16 7 <http://www.ncbi.nlm.nih.gov/pubmed/30322984>  
17  
18 8 19. Cerdá M, Wall M, Feng T, Al E. Association of state recreational marijuana laws with  
19  
20 9 adolescent marijuana use. *JAMA Pediatr* [Internet]. 2016 [cited 2018 Sep 2]; Available  
21  
22 10 from: <https://jamanetwork.com/journals/jamapediatrics/fullarticle/2593707>  
23  
24 11 20. Kerr DCR, Bae H, Koval AL. Oregon recreational marijuana legalization: Changes in  
25  
26 12 undergraduates’ marijuana use rates from 2008 to 2016. *Psychol Addict Behav* [Internet].  
27  
28 13 2018 [cited 2018 Sep 2]; Available from:  
29  
30 14 [https://www.researchgate.net/profile/David\\_Kerr2/publication/325344990\\_Oregon\\_recreational\\_marijuana\\_legalization\\_Changes\\_in\\_undergraduates'\\_marijuana\\_use\\_rates\\_from\\_2008-2016/links/5b06ebdfa6fdcc8c252432e2/Oregon-recreational-marijuana-legalization-](https://www.researchgate.net/profile/David_Kerr2/publication/325344990_Oregon_recreational_marijuana_legalization_Changes_in_undergraduates'_marijuana_use_rates_from_2008-2016/links/5b06ebdfa6fdcc8c252432e2/Oregon-recreational-marijuana-legalization-)  
31  
32 15 tional\_marijuana\_legalization\_Changes\_in\_undergraduates'\_marijuana\_use\_rates\_from\_2  
33  
34 16 008-2016/links/5b06ebdfa6fdcc8c252432e2/Oregon-recreational-marijuana-legalization-  
35  
36 17 Chang  
37  
38 18 21. Ghosh TS, Vigil DI, Maffey A, Tolliver R, Van Dyke M, Kattari L, et al. Lessons learned  
39  
40 19 after three years of legalized, recreational marijuana: The Colorado experience. *Prev Med*  
41  
42 20 (Baltim) [Internet]. 2017 [cited 2018 Sep 2];104:4–6. Available from:  
43  
44 21 <https://www.sciencedirect.com/science/article/pii/S0091743517300762>  
45  
46 22 22. Estoup AC, Moise-Campbell C, Varma M, Stewart DG. The Impact of Marijuana  
47  
48 23 Legalization on Adolescent Use, Consequences, and Perceived Risk. *Subst Use Misuse*  
49  
50  
51  
52  
53  
54  
55  
56  
57  
58  
59  
60

- 1  
2  
3 1 [Internet]. 2016 Dec 5 [cited 2018 Sep 2];51(14):1881–7. Available from:  
4  
5 2 <https://www.tandfonline.com/doi/full/10.1080/10826084.2016.1200623>  
6  
7  
8 3 23. Dirisu O, Shickle D, Elsey H. Influence of legal status on the uptake of cannabis in young  
9  
10 4 people [Internet]. Vol. 29, Current Opinion in Psychiatry. 2016 [cited 2018 Dec 16]. p.  
11  
12 5 231–5. Available from:  
13  
14 6 [http://content.wkhealth.com/linkback/openurl?sid=WKPTLP:landingpage&an=00001504-](http://content.wkhealth.com/linkback/openurl?sid=WKPTLP:landingpage&an=00001504-201607000-00002)  
15  
16 7 201607000-00002  
17  
18  
19 8 24. Fischer B, Russell C, Rehm J, Leece P. Assessing the public health impact of cannabis  
20  
21 9 legalization in Canada: core outcome indicators towards an ‘index’ for monitoring and  
22  
23 10 evaluation. J Public Health (Bangkok) [Internet]. 2018 [cited 2018 Dec 1]; Available  
24  
25 11 from: [https://academic.oup.com/jpubhealth/advance-](https://academic.oup.com/jpubhealth/advance-article/doi/10.1093/pubmed/fdy090/5025670)  
26  
27 12 article/doi/10.1093/pubmed/fdy090/5025670  
28  
29  
30  
31 13 25. Statistics Canada. National Cannabis Survey (NCS) [Internet]. 2018 [cited 2019 Jan 9].  
32  
33 14 Available from:  
34  
35 15 <http://www23.statcan.gc.ca/imdb/p2SV.pl?Function=getSurvey&SDDS=5262>  
36  
37  
38 16 26. von Elm E, Altman DG, Egger M, Pocock SJ, Gøtzsche PC, Vandenbroucke JP, et al. The  
39  
40 17 Strengthening the Reporting of Observational Studies in Epidemiology (STROBE)  
41  
42 18 Statement: Guidelines for Reporting Observational Studies. PLoS Med [Internet]. 2007  
43  
44 19 Oct 16 [cited 2018 Dec 11];4(10):e296. Available from:  
45  
46 20 <https://dx.plos.org/10.1371/journal.pmed.0040296>  
47  
48  
49 21 27. Statistics Canada. National Cannabis Survey Questionnaire [Internet]. 2018 [cited 2019  
50  
51 22 Jan 9]. Available from:  
52  
53 23 [http://www23.statcan.gc.ca/imdb/p3Instr.pl?Function=assembleInstr&lang=en&Item\\_Id=](http://www23.statcan.gc.ca/imdb/p3Instr.pl?Function=assembleInstr&lang=en&Item_Id=)  
54  
55  
56  
57  
58  
59  
60

- 1  
2  
3 1 1173861  
4  
5  
6 2 28. Statistics Canada. The Research Data Centres (RDC) Program [Internet]. [cited 2019 Jan  
7  
8 3 9]. Available from: <https://www.statcan.gc.ca/eng/rdc/index>  
9  
10 4 29. Peduzzi P, Concato J, Kemper E, Holford TR, Feinstein AR. A simulation study of the  
11  
12 5 number of events per variable in logistic regression analysis. *J Clin Epidemiol* [Internet].  
13  
14 6 1996 Dec;49(12):1373–9. Available from: <http://www.ncbi.nlm.nih.gov/pubmed/8970487>  
15  
16  
17 7 30. Gagne C, Roberts G, Keown L-A. Weighted estimation and bootstrap variance estimation  
18  
19 8 for analyzing survey data: How to implement in selected software. Ottawa, ON; 2014.  
20  
21 9 31. Norton EC, Miller MM, Kleinman LC. Computing adjusted risk ratios and risk differences  
22  
23 10 in Stata. *Stata J* [Internet]. 2013;13(3):492–509. Available from:  
24  
25 11 <https://pdfs.semanticscholar.org/28cb/e7852bb3d11c5e9518c0a7a06ce022a89ccb.pdf>  
26  
27  
28 12 32. Hosmer DW, Lemeshow S. Goodness of fit tests for the multiple logistic regression  
29  
30 13 model. *Commun Stat - Theory Methods* [Internet]. 1980 [cited 2018 Dec 7];9(10):1043–  
31  
32 14 69. Available from: <http://www.tandfonline.com/doi/abs/10.1080/03610928008827941>  
33  
34  
35 15 33. StataCorp. Stata Statistical Software: Release 15. College Station, TX: StataCorp LLC;  
36  
37 16 2017.  
38  
39  
40 17 34. Canadian Institutes of Health Research, Natural Sciences and Engineering Research  
41  
42 18 Council of Canada, Social Sciences and Humanities Research Council of Canada. Tri-  
43  
44 19 Council Policy Statement: Ethical conduct for research involving humans. Medical  
45  
46 20 Research Council of Canada. 2014. 1-10 p.  
47  
48  
49 21 35. Hansen L. Cannabis edibles, drinks will mark “2nd wave” of legalization | CBC News.  
50  
51 22 2018 Nov 12; Available from: [https://www.cbc.ca/news/canada/ottawa/cannabis-](https://www.cbc.ca/news/canada/ottawa/cannabis-legalization-second-wave-edibles-1.4901297)  
52  
53 23 [legalization-second-wave-edibles-1.4901297](https://www.cbc.ca/news/canada/ottawa/cannabis-legalization-second-wave-edibles-1.4901297)  
54  
55  
56  
57  
58  
59  
60



- 1  
2  
3 1 36. Charlebois S, Somogyi S. Marijuana-infused food and Canadian consumers' willingness  
4  
5 2 to consider recreational marijuana as a food ingredient [Internet]. 2017 [cited 2019 Jan 9].  
6  
7 3 Available from:  
8  
9  
10 4 [https://cdn.dal.ca/content/dam/dalhousie/pdf/management/News/Preliminary results](https://cdn.dal.ca/content/dam/dalhousie/pdf/management/News/Preliminary%20results%20cannabis-infused%20foods%20EN.pdf)  
11  
12 5 [cannibis-infused foods EN.pdf](https://cdn.dal.ca/content/dam/dalhousie/pdf/management/News/Preliminary%20results%20cannabis-infused%20foods%20EN.pdf)  
13  
14 6 37. Deloitte. A society in transition, an industry ready to bloom [Internet]. 2018 [cited 2019  
15  
16 7 Jan 9]. Available from:  
17  
18 8 [https://www2.deloitte.com/content/dam/Deloitte/ca/Documents/consulting/ca-cannabis-](https://www2.deloitte.com/content/dam/Deloitte/ca/Documents/consulting/ca-cannabis-2018-report-en.PDF)  
19  
20 9 [2018-report-en.PDF](https://www2.deloitte.com/content/dam/Deloitte/ca/Documents/consulting/ca-cannabis-2018-report-en.PDF)  
21  
22 10 38. Cohn AM, Johnson AL, Rose SW, Rath JM, Villanti AC. Support for Marijuana  
23  
24 11 Legalization and Predictors of Intentions to Use Marijuana More Often in Response to  
25  
26 12 Legalization Among U.S. Young Adults. *Subst Use Misuse* [Internet]. 2017 Jan 28 [cited  
27  
28 13 2018 Sep 16];52(2):203–13. Available from:  
29  
30 14 <https://www.tandfonline.com/doi/full/10.1080/10826084.2016.1223688>  
31  
32 15 39. Mehra R, Moore BA, Crothers K, Tetrault J, Fiellin DA. The association between  
33  
34 16 marijuana smoking and lung cancer: A systematic review [Internet]. Vol. 166, *Archives of*  
35  
36 17 *Internal Medicine*. American Medical Association; 2006 [cited 2018 Mar 15]. p. 1359–67.  
37  
38 18 Available from:  
39  
40 19 <http://archinte.jamanetwork.com/article.aspx?doi=10.1001/archinte.166.13.1359>  
41  
42 20 40. Kandel DB. Examining the Gateway Hypothesis: Stages and Pathways of Drug  
43  
44 21 Involvement. In: *Stages and Pathways of Drug Involvement* [Internet]. 2002 [cited 2018  
45  
46 22 Mar 15]. p. 3–16. Available from:  
47  
48 23 <https://books.google.ca/books?hl=en&lr=&id=N5HAU639wnMC&oi=fnd&pg=PR9&dq=>  
49  
50  
51  
52  
53  
54  
55  
56  
57  
58  
59  
60

- 1  
2  
3 1 DB+Kandel+Stages+and+pathways+of+drug+involvement:+examining+the+gateway+hy  
4  
5 2 pothesis,+Cambridge+University+Press,+New+York+(2002)&ots=KDpqGJ9D6W&sig=  
6  
7 WjZTFORoilbrpPTHqnaRjGF8D6c  
8  
9  
10 4 41. Memedovich KA, Dowsett LE, Spackman E, Noseworthy T, Clement F. The adverse  
11  
12 5 health effects and harms related to marijuana use: an overview review. *C Open* [Internet].  
13  
14 6 2018 [cited 2018 Sep 16];6(3):E339–46. Available from:  
15  
16 7 <http://cmajopen.ca/content/6/3/E339.full>  
17  
18  
19 8 42. Walsh Z, Gonzales R, Crosby K, Carroll C. Medical cannabis and mental health: a  
20  
21 9 systematic review. *Clin Psychol Rev* [Internet]. 2017;51:15–29. Available from:  
22  
23 10 <https://www.sciencedirect.com/science/article/pii/S0272735816300939>  
24  
25  
26 11 43. Ogbome AC, Smart RG, Weber T, Birchmore-Timney C. Who is using cannabis as a  
27  
28 12 medicine and why: An exploratory study. *J Psychoactive Drugs* [Internet]. 2000 Dec 6  
29  
30 13 [cited 2018 Sep 2];32(4):435–43. Available from:  
31  
32 14 <http://www.tandfonline.com/doi/abs/10.1080/02791072.2000.10400245>  
33  
34  
35 15 44. Walsh Z, Callaway R, Belle-Isle L, Capler R, Kay R, Lucas P, et al. Cannabis for  
36  
37 16 therapeutic purposes: Patient characteristics, access, and reasons for use. *Int J Drug Policy*  
38  
39 17 [Internet]. 2013 Nov 1 [cited 2018 Mar 31];24(6):511–6. Available from:  
40  
41 18 [http://www.ijdp.org/article/S0955-3959\(13\)00135-7/fulltext](http://www.ijdp.org/article/S0955-3959(13)00135-7/fulltext)  
42  
43  
44 19 45. Ware MA, Wang T, Shapiro S, Robinson A, Ducruet T, Huynh T, et al. Smoked cannabis  
45  
46 20 for chronic neuropathic pain: a randomized controlled trial. *CMAJ* [Internet]. 2010 [cited  
47  
48 21 2018 Sep 2];182(14):E694-701. Available from:  
49  
50 22 [http://www.cmaj.ca/content/182/14/E694.short?casa\\_token=3FbMpiUjELsAAAAA:zMP](http://www.cmaj.ca/content/182/14/E694.short?casa_token=3FbMpiUjELsAAAAA:zMP)  
51  
52 23 [oogYvy9GswcTRkZKcOcaoULWNwu1DAmrrmFaAPfDi3MSWjBx\\_Zsy2hqvsGF3udX](http://www.cmaj.ca/content/182/14/E694.short?casa_token=3FbMpiUjELsAAAAA:zMP)  
53  
54  
55  
56  
57  
58  
59  
60

- 1  
2  
3 1 NDq4c0sr\_k  
4  
5 2 46. Tibbo P, Cracker CE, Lam RW, Meyer J, Sareen J, Aitchison KJ. Implications of  
6  
7 Cannabis Legalization on Youth and Young Adults [Internet]. Vol. 63, Canadian Journal  
8 3  
9 of Psychiatry. 2018 [cited 2018 Dec 16]. p. 65–71. Available from:  
10 4  
11  
12 5  
13 <http://journals.sagepub.com/doi/10.1177/0706743718759031>  
14  
15 6 47. Vigil DI, Van Dyke M, Hall KE, Contreras AE, Ghosh TS, Wolk L. Marijuana Use and  
16  
17 Related Health Care Encounters in Colorado Before and After Retail Legalization. *Int J*  
18  
19 *Ment Health Addict* [Internet]. 2018 Aug 18 [cited 2018 Dec 16];16(4):806–12. Available  
20 8  
21 from: <http://link.springer.com/10.1007/s11469-018-9901-0>  
22 9  
23  
24 10 48. Wang GS, Hall K, Vigil D, Banerji S, Monte A, VanDyke M. Marijuana and acute health  
25  
26 care contacts in Colorado. *Prev Med (Baltim)* [Internet]. 2017 Nov 1 [cited 2018 Dec  
27  
28 12  
29 16];104:24–30. Available from: [https://www-sciencedirect-](https://www-sciencedirect-com.libaccess.lib.mcmaster.ca/science/article/pii/S0091743517301202)  
30  
31 [com.libaccess.lib.mcmaster.ca/science/article/pii/S0091743517301202](https://www-sciencedirect-com.libaccess.lib.mcmaster.ca/science/article/pii/S0091743517301202)  
32  
33 14 49. Wang GS, Davies SD, Halmo LS, Sass A, Mistry RD. Impact of Marijuana Legalization  
34  
35 in Colorado on Adolescent Emergency and Urgent Care Visits. *J Adolesc Heal* [Internet].  
36 15  
37 2018 Aug 1 [cited 2018 Dec 16];63(2):239–41. Available from: [https://www-](https://www-sciencedirect-com.libaccess.lib.mcmaster.ca/science/article/pii/S1054139X18300041)  
38 16  
39 [sciencedirect-com.libaccess.lib.mcmaster.ca/science/article/pii/S1054139X18300041](https://www-sciencedirect-com.libaccess.lib.mcmaster.ca/science/article/pii/S1054139X18300041)  
40 17  
41  
42 18 50. Keyhani S, Steigerwald S, Ishida J, Vali M, Cerdá M, Hasin D, et al. Risks and benefits of  
43  
44 marijuana use a national survey of U.S. Adults. *Ann Intern Med* [Internet]. 2018 Sep 4  
45 19  
46 [cited 2018 Dec 7];169(5):282–90. Available from:  
47 20  
48  
49 21  
50 <http://www.ncbi.nlm.nih.gov/pubmed/30039154>  
51  
52 51. Porath-Waller A, Brown J, Clark H. What Canadian youth think about cannabis [Internet].  
53  
54 Canadian Centre on Substance Abuse. 2013 [cited 2019 Jan 9]. p. 1–57. Available from:  
55  
56  
57  
58  
59  
60

- 1  
2  
3 1 [http://www.ccdus.ca/Resource Library/CCSA-What-Canadian-Youth-Think-about-](http://www.ccdus.ca/Resource Library/CCSA-What-Canadian-Youth-Think-about-Cannabis-2013-en.pdf)  
4  
5 2 [Cannabis-2013-en.pdf](http://www.ccdus.ca/Resource Library/CCSA-What-Canadian-Youth-Think-about-Cannabis-2013-en.pdf)  
6  
7  
8 3 52. Han BH, Palamar JJ. Marijuana use by middle-aged and older adults in the United States,  
9  
10 4 2015–2016. *Drug Alcohol Depend* [Internet]. 2018 Oct 1 [cited 2018 Sep 30];191:374–81.  
11  
12 5 Available from:  
13  
14 6 <https://www.sciencedirect.com/science/article/pii/S0376871618304538?via%3Dihub>  
15  
16  
17 7 53. O'malley PM, Bachman JG, Johnston LD. Reliability and Consistency in Self-Reports of  
18  
19 8 Drug Use. *Int J Addict* [Internet]. 1983 Jan 3 [cited 2018 Mar 14];18(6):805–24. Available  
20  
21 9 from: <http://www.tandfonline.com/doi/full/10.3109/10826088309033049>  
22  
23  
24 10 54. Harrison ER, Haaga J, Richards T. Self-Reported Drug Use Data: What Do They Reveal?  
25  
26 11 *Am J Drug Alcohol Abuse* [Internet]. 1993 Jan 7 [cited 2018 Mar 14];19(4):423–41.  
27  
28 12 Available from: <http://www.tandfonline.com/doi/full/10.3109/00952999309001632>  
29  
30  
31 13  
32  
33 14  
34  
35 15  
36  
37  
38 16  
39 17  
40 18  
41 19  
42 20  
43 21  
44 22  
45 23  
46 24  
47 25  
48 26  
49 27  
50 28  
51 29  
52 30  
53 31  
54  
55  
56  
57  
58  
59  
60

1  
2  
3  
4  
5  
6  
7  
8  
9  
10  
11  
12  
13  
14  
15  
16  
17  
18  
19  
20  
21  
22  
23  
24  
25  
26  
27  
28  
29  
30  
31  
32  
33  
34  
35  
36  
37  
38  
39  
40  
41  
42  
43  
44  
45  
46  
47  
48  
49  
50  
51  
52  
53  
54  
55  
56  
57  
58  
59  
60

**FIGURES & TABLES**

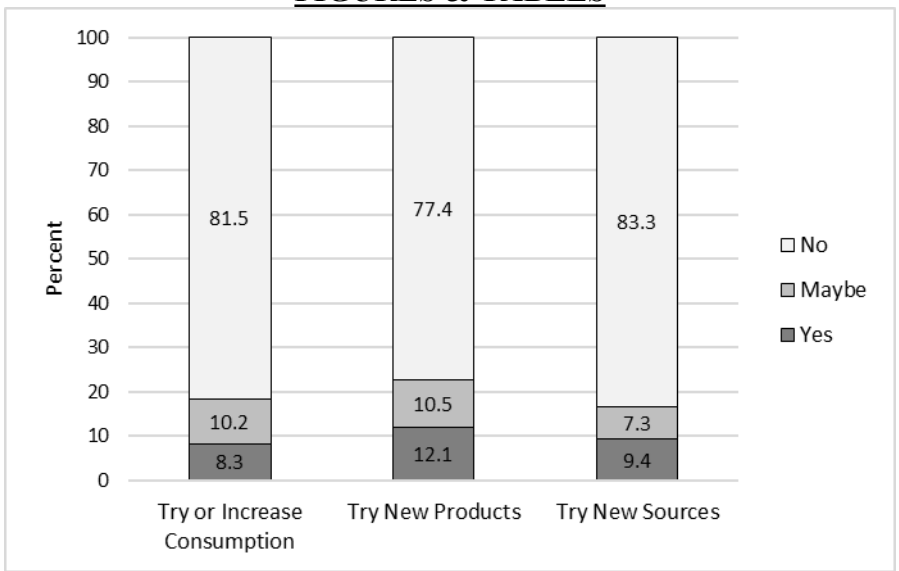

**Figure 1:** Full responses to whether respondents would (1) try or increase their cannabis consumption (n = 29,928,424); (2) try or consume different types of cannabis products (n = 29,607,064); and (3) obtain or purchase cannabis from another source (n = 29,300,593), following legalization for recreational purposes.

1 **Table 1:** Weighted table of respondent characteristics (n = 27,808,08).

| Variable                             | Level                                          | Percent (95%CI)                          |
|--------------------------------------|------------------------------------------------|------------------------------------------|
| <b>Gender</b>                        | Female                                         | 50.3% (50.0–50.6)                        |
|                                      | Male                                           | 49.7% (49.4–50.0)                        |
| <b>Age (Years)</b>                   | 65 or older                                    | 18.5% (18.2–18.7)                        |
|                                      | 45–64                                          | 32.6% (32.3–32.9)                        |
|                                      | 35–44                                          | 16.6% (16.4–16.8)                        |
|                                      | 25–34                                          | 19.5% (18.7–20.4)                        |
|                                      | 15–24                                          | 12.9% (12.0–13.7)                        |
| <b>Cannabis use in past 3 months</b> | No                                             | 84.8% (84.0–85.7)                        |
|                                      | Yes                                            | 15.2% (14.3–16.0)                        |
| <b>Education Level</b>               | Bachelor’s or higher                           | 32.7% (31.7–33.8)                        |
|                                      | College or Diploma                             | 33.7% (32.6–34.7)                        |
|                                      | Less than HS or HS only                        | 33.6% (32.6–34.7)                        |
| <b>Income Level</b>                  | Less than \$40,000                             | 49.7% (48.7–50.8)                        |
|                                      | \$40,000–79,999                                | 32.0% (31.0–33.1)                        |
|                                      | \$80,000 or more                               | 18.3% (17.5–19.0)                        |
| <b>Main Activity</b>                 | Employed                                       | 59.2% (58.1–60.2)                        |
|                                      | Student                                        | 6.8% (6.1–7.5)                           |
|                                      | Caregiving or Housework                        | 8.4% (7.8–9.1)                           |
|                                      | Retired or LTI                                 | 20.6% (20.0–21.2)                        |
|                                      | Other                                          | 5.0% (4.4–5.6)                           |
| <b>Mental Health</b>                 | Good to Excellent                              | 93.8% (93.2–94.4)                        |
|                                      | Fair or Poor                                   | 6.2% (5.6–6.8)                           |
| <b>Provinces (Grouped)</b>           | Atlantic Provinces                             | 6.5% (6.4–6.6)                           |
|                                      | Quebec                                         | 22.9% (22.7–23.2)                        |
|                                      | Ontario                                        | 39.4% (39.1–39.7)                        |
|                                      | Manitoba                                       | 3.4% (3.3–3.4)                           |
|                                      | Saskatchewan                                   | 3.0% (2.9–3.0)                           |
|                                      | Alberta                                        | 11.5% (11.3–11.6)                        |
|                                      | British Columbia<br>Territorial Capital Cities | 13.3% (13.1–13.5)<br>0.05% (0.049–0.051) |
| <b>Survey wave</b>                   | 1                                              | 32.9% (32.6–33.2)                        |
|                                      | 2                                              | 33.5% (33.2–33.8)                        |
|                                      | 3                                              | 33.7% (33.4–34.0)                        |

2 Percentage totals for ages and provinces do not add up to 100% exactly due to bootstrapping and  
3 rounding. HS = high school, LTI = long-term illness.

1 **Table 2:** Variables associated with intent to try or increase cannabis use post-legalization (n =  
 2 27,808,081).  
 3

| Variable                                     | Levels                     | Unadjusted OR<br>(95% CI) | Adjusted OR<br>(95% CI) | Adjusted risk increase<br>percent (95%CI) |
|----------------------------------------------|----------------------------|---------------------------|-------------------------|-------------------------------------------|
| <b>Gender</b>                                | Female                     | Ref.                      | Ref.                    | Ref.                                      |
|                                              | Male                       | 1.3* (1.15–1.45)          | 1.1 (1.0–1.3)           | N/a                                       |
| <b>Age<br/>(years)</b>                       | 65 or older                | Ref.                      | Ref.                    | Ref.                                      |
|                                              | 45–64                      | 1.7* (1.4–2.1)            | 1.3 (1.0–1.6)           | N/a                                       |
|                                              | 35–44                      | 2.8* (2.3–3.3)            | 1.8* (1.3–2.4)          | 6.8% (3.5–10.1)                           |
|                                              | 25–34                      | 4.2* (3.5–5.1)            | 2.6* (1.9–3.4)          | 12.6% (8.8–16.4)                          |
|                                              | 15–24                      | 5.3* (4.2–6.8)            | 3.8* (2.6–5.6)          | 20.1% (13.9–26.2)                         |
| <b>Cannabis<br/>use in past<br/>3 months</b> | No                         | Ref.                      | Ref.                    | Ref.                                      |
|                                              | Yes                        | 4.3* (3.7–5.0)            | 3.3* (2.8–3.9)          | 20.4% (17.1–23.6)                         |
| <b>Education<br/>Level</b>                   | ≥ Bachelor's               | Ref.                      | Ref.                    | Ref.                                      |
|                                              | College or diploma         | 0.8* (0.7–0.9)            | 0.9 (0.7–1.0)           | N/a                                       |
|                                              | ≤ HS                       | 0.9 (0.8–1.1)             | 0.9 (0.8–1.1)           | N/a                                       |
| <b>Income<br/>Level</b>                      | < \$40,000                 | Ref.                      | Ref.                    | Ref.                                      |
|                                              | \$40–79,999                | 1.0 (0.8–1.1)             | 1.2* (1.0–1.4)          | 2.5% (0.3–4.7)                            |
|                                              | ≥ \$80,000                 | 1.2* (1.1–1.4)            | 1.5* (1.3–1.9)          | 6.1% (3.2–9.0)                            |
| <b>Main<br/>Activity</b>                     | Employed                   | Ref.                      | Ref.                    | Ref.                                      |
|                                              | Student                    | 1.4* (1.1–1.9)            | 0.9 (0.6–1.3)           | N/a                                       |
|                                              | Caregiving or<br>housework | 0.8 (0.7–1.0)             | 1.0 (0.8–1.3)           | N/a                                       |
|                                              | Retired or LTI             | 0.4* (0.4–0.5)            | 0.9 (0.7–1.1)           | N/a                                       |
|                                              | Other                      | 1.1 (0.8–1.4)             | 0.8 (0.6–1.1)           | N/a                                       |
| <b>Mental<br/>Health</b>                     | Good to excellent          | Ref.                      | Ref.                    | Ref.                                      |
|                                              | Poor or fair               | 2.6* (2.1–3.2)            | 2.0* (1.6–2.6)          | 11.5% (6.7–16.2)                          |

4 \* = Wald test for predictors being significant in model at  $p < 0.05$ .

5 Adjusted model included province/territory and survey wave.

6 N/a = an adjusted risk difference was not calculated for adjusted odd ratios that were not significant.
